# Supplementary material for: Eu2+ doped halide perovskite KCaCl3 with high-efficiency blue emission and scintillation application
Source: Royal Society of Chemistry journal article supplement (doi:10.1039/d2tc01117d), 2022-01-01
Supplement: d2tc01117d1.pdf [file d2tc01117d1.pdf]

## Supporting Information

### **Eu<sup>2+</sup> doped halide perovskite KCaCl<sub>3</sub> with high-efficiency blue emission and the scintillation application**

Kuangnan Lyu, Enhai Song and Zhiguo Xia\*

The State Key Laboratory of Luminescent Materials and Devices, Guangdong Provincial Key Laboratory of Fiber Laser Materials and Applied Techniques, School of Materials Science and Engineering, South China University of Technology, Guangzhou 510640, P. R. China.

**Table S1** The total energy ( $E_0$ ) of fifteen proposed substitution geometry models for a 2×2×2 supercell of KCaCl<sub>3</sub>:0.13Eu<sup>2+</sup> with two Ca<sup>2+</sup> ions replaced by two Eu<sup>2+</sup> ions.

| <b>Model</b> | <b><math>E_0</math> (eV)</b> |
|--------------|------------------------------|
| M1           | -632.448                     |
| M2           | -632.448                     |
| M3           | -632.447                     |
| M4           | -632.452                     |
| M5           | -632.448                     |
| M6           | -632.452                     |
| M7           | -632.451                     |
| M8           | -632.45                      |
| M9           | -632.448                     |
| M10          | -632.452                     |
| M11          | -632.446                     |
| M12          | -632.448                     |
| M13          | -632.449                     |
| M14          | -632.453                     |
| M15          | -632.453                     |

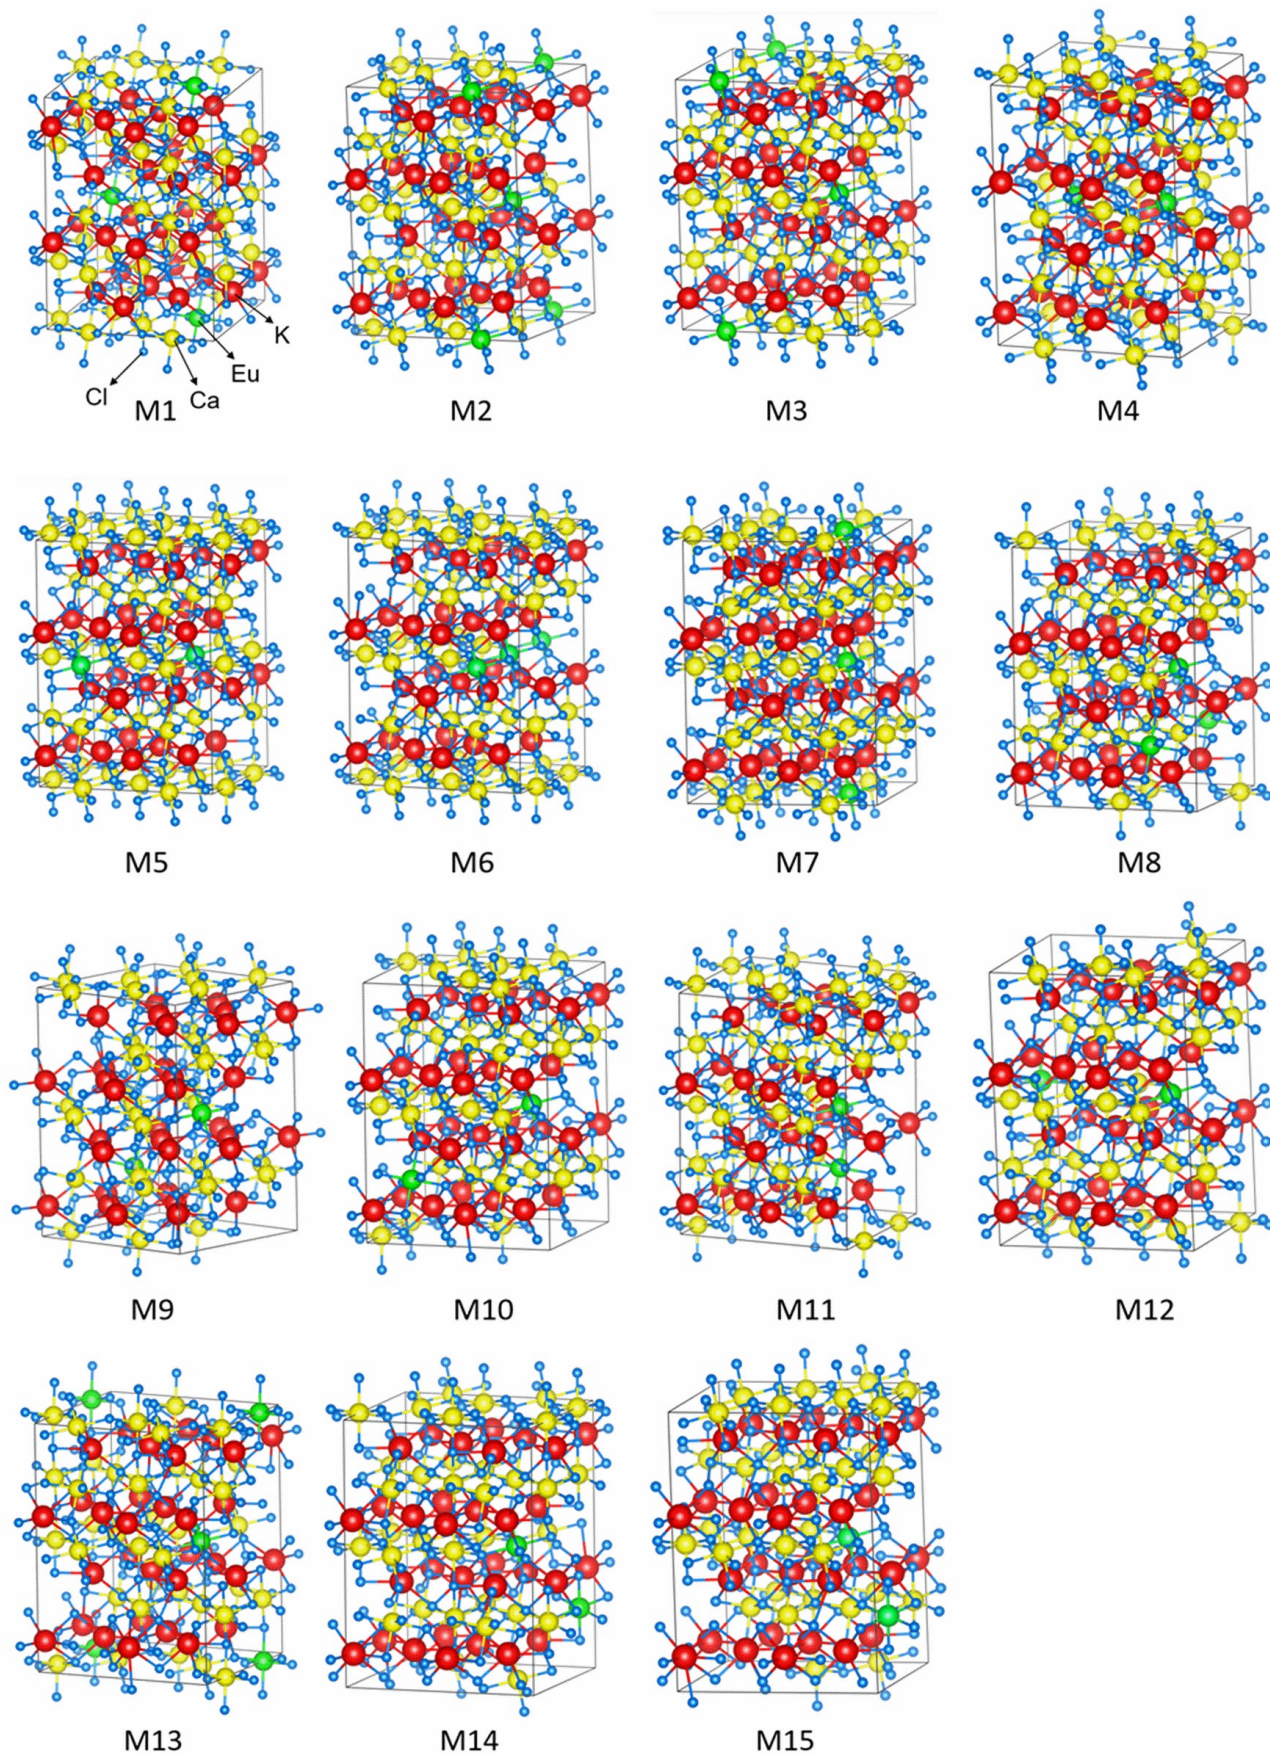

**Figure S1.** Possible substitution geometry models (denoted as M1-M15) for a  $2 \times 2 \times 2$  supercell of  $\text{KCaCl}_3:\text{Eu}^{2+}$  with two  $\text{Ca}^{2+}$  replaced by two  $\text{Eu}^{2+}$ .

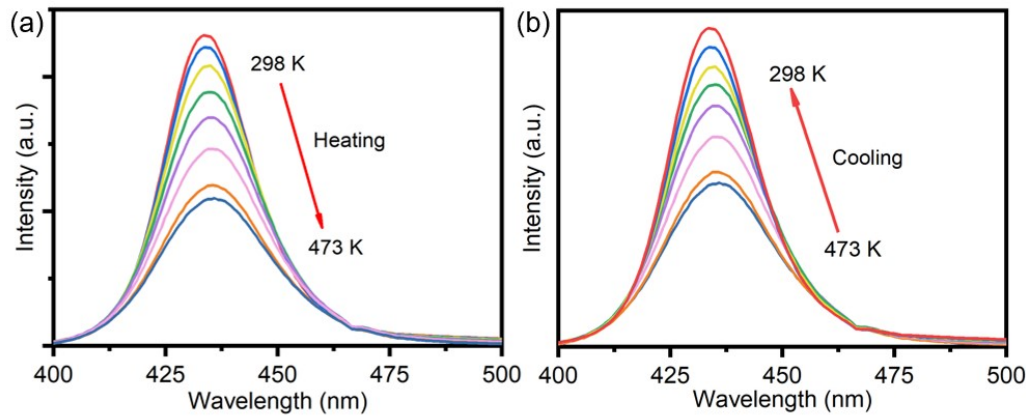

**Figure S2.** Temperature dependent emission spectrum of  $\text{KCaCl}_3:0.13\text{Eu}^{2+}$  particles through heating (a) and cooling (b) processes.

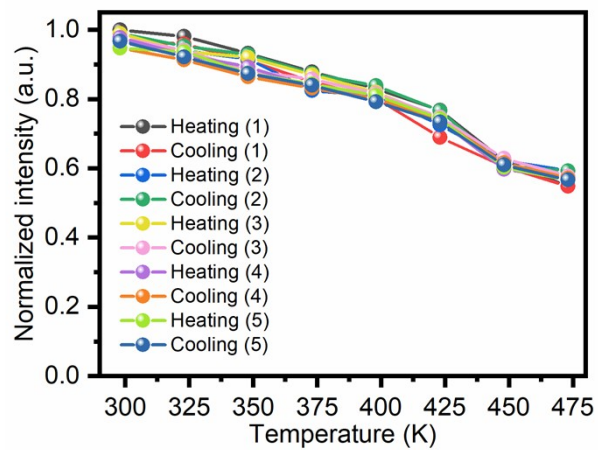

**Figure S3.** T-cycles of  $\text{KCaCl}_3:0.13\text{Eu}^{2+}$  powders.

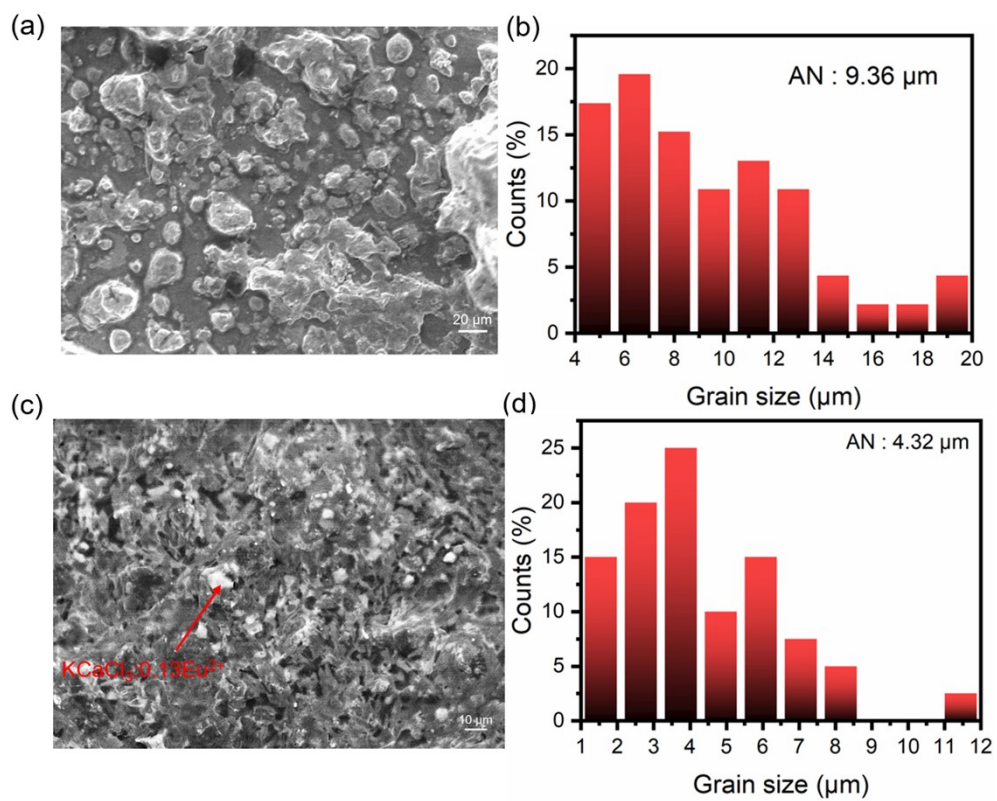

**Figure S4.** SEM image and size distribution of the  $\text{KCaCl}_3:0.13\text{Eu}^{2+}$  powders (a), (b); and  $\text{KCaCl}_3:0.13\text{Eu}^{2+}$  film (c), (d).
